# Supplementary material for: Relationship between temperature and apparent shape of pristine ice crystalsderived from polarimetric cloud radar observations during the ACCEPT campaign
Source: Copernicus journal article supplement (doi:10.5194/amt-9-3739-2016), 2016-08-12
Supplement: Supplementary file 1 [file amt-9-3739-2016-supplement.pdf]

Supplement of Atmos. Meas. Tech., 9, 3739–3754, 2016  
<http://www.atmos-meas-tech.net/9/3739/2016/>  
doi:10.5194/amt-9-3739-2016-supplement  
© Author(s) 2016. CC Attribution 3.0 License.

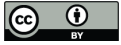

*Supplement of*

## **Relationship between temperature and apparent shape of pristine ice crystals derived from polarimetric cloud radar observations during the ACCEPT campaign**

**Alexander Myagkov et al.**

*Correspondence to:* Alexander Myagkov ([alexander.myagkov@radiometer-physics.de](mailto:alexander.myagkov@radiometer-physics.de))

The copyright of individual parts of the supplement might differ from the CC-BY 3.0 licence.

## Cases used for the analysis

| N.  | Date        | Time [UTC] | Cloud top height [m] | Cloud top temperature [°C] | Source of temperature | Polarizability ratio | Distance from the cloud top [m] |
|-----|-------------|------------|----------------------|----------------------------|-----------------------|----------------------|---------------------------------|
| 1.  | 12 Oct 2014 | 15:16      | 5200                 | -14.9                      | MWR                   | 0.62±0.09            | 150                             |
| 2.  | 15 Oct 2014 | 19:34      | 3500                 | -5.9                       | MWR                   | 1.53±0.21            | 260                             |
| 3.  | 15 Oct 2014 | 23:10      | 5150                 | -16.9                      | RS                    | 0.54±0.11            | 400                             |
| 4.  | 18 Oct 2014 | 01:23      | 5000                 | -7.8                       | RS                    | 1.07±0.1             | 800                             |
| 5.  | 18 Oct 2014 | 02:40      | 4500                 | -6.5                       | RS                    | 1.57±0.2             | 100                             |
| 6.  | 20 Oct 2014 | 16:40      | 5300                 | -16.4                      | MWR                   | 0.48±0.13            | 380                             |
| 7.  | 20 Oct 2014 | 17:22      | 6300                 | -23.9                      | MWR                   | 0.77±0.06            | 470                             |
| 8.  | 20 Oct 2014 | 18:16      | 3600                 | -6.1                       | MWR                   | 1.5±0.16             | 240                             |
| 9.  | 21 Oct 2014 | 09:16      | 3300                 | -4.5                       | GDAS1                 | 1.55±0.15            | 150                             |
| 10. | 22 Oct 2014 | 02:37      | 3200                 | -13.2                      | GDAS1                 | 0.41±0.07            | 300                             |
| 11. | 22 Oct 2014 | 02:52      | 3200                 | -13.2                      | GDAS1                 | 0.81±0.12            | 550                             |
| 12. | 22 Oct 2014 | 12:16      | 2200                 | -4.5                       | GDAS1                 | 1.73±0.17            | 50                              |
| 13. | 29 Oct 2014 | 22:37      | 4300                 | -8.8                       | RS                    | 0.87±0.08            | 200                             |
| 14. | 1 Nov 2014  | 17:46      | 5200                 | -14.3                      | GDAS1                 | 0.48±0.1             | 90                              |
| 15. | 2 Nov 2014  | 17:04      | 5200                 | -16.8                      | RS                    | 0.57±0.09            | 720                             |
| 16. | 7 Nov 2014  | 20:49      | 2300                 | -4.2                       | GDAS1                 | 1.57±0.17            | 120                             |
| 17. | 9 Nov 2014  | 05:57      | 4100                 | -14.6                      | GDAS1                 | 0.53±0.08            | 80                              |
| 18. | 9 Nov 2014  | 21:34      | 2600                 | -3.4                       | RS                    | 1.54±0.13            | 20                              |
| 19. | 10 Nov 2014 | 02:27      | 4500                 | -13.5                      | RS                    | 0.53±0.1             | 480                             |
| 20. | 10 Nov 2014 | 02:54      | 5500                 | -20                        | RS                    | 0.92±0.08            | 450                             |
| 21. | 10 Nov 2014 | 05:39      | 2300                 | -4.3                       | GDAS1                 | 1.51±0.17            | 120                             |
| 22. | 18 Nov 2014 | 08:24      | 2300                 | -3.6                       | GDAS1                 | 1.73±0.19            | 60                              |

Note: MWR – microwave radiometer, RS – radiosonde, GDAS1 – global data assimilation system
